# Supplementary material for: Reprogramming mechanism dissection and trophoblast replacement application in monkey somatic cell nuclear transfer
Source: Springer Nature journal article supplement (doi:10.1038/s41467-023-43985-7), 2024-01-16
Supplement: MOESM1 [file 41467_2023_43985_MOESM1_ESM.pdf]

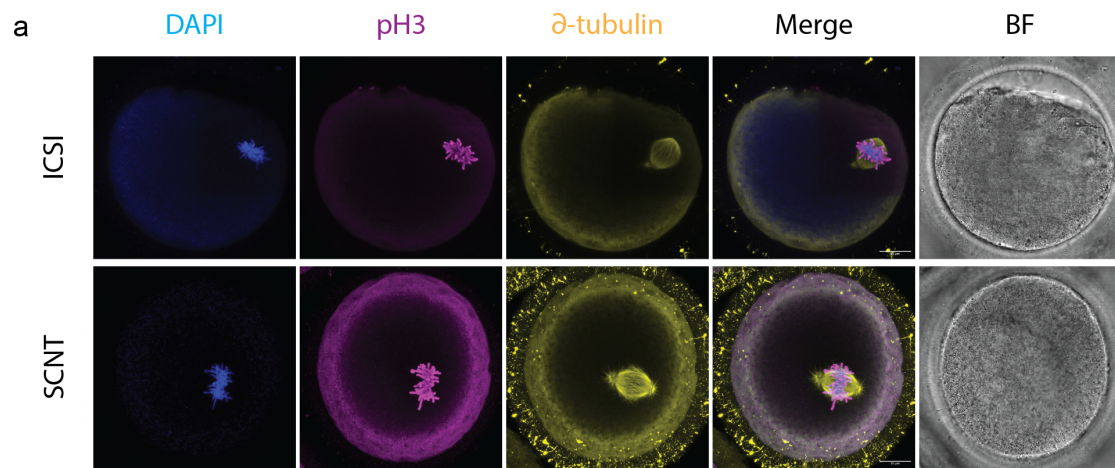

Supplementary Figure 1. **Examination of the M-phase chromosome organization in monkey SCNT embryos.**

**a** Immunostaining revealing the chromosome organization of SCNT embryos during their first M-phase. BF, bright field images. ICSI group, n=13 independent embryos. SCNT group, n=19 independent embryos.

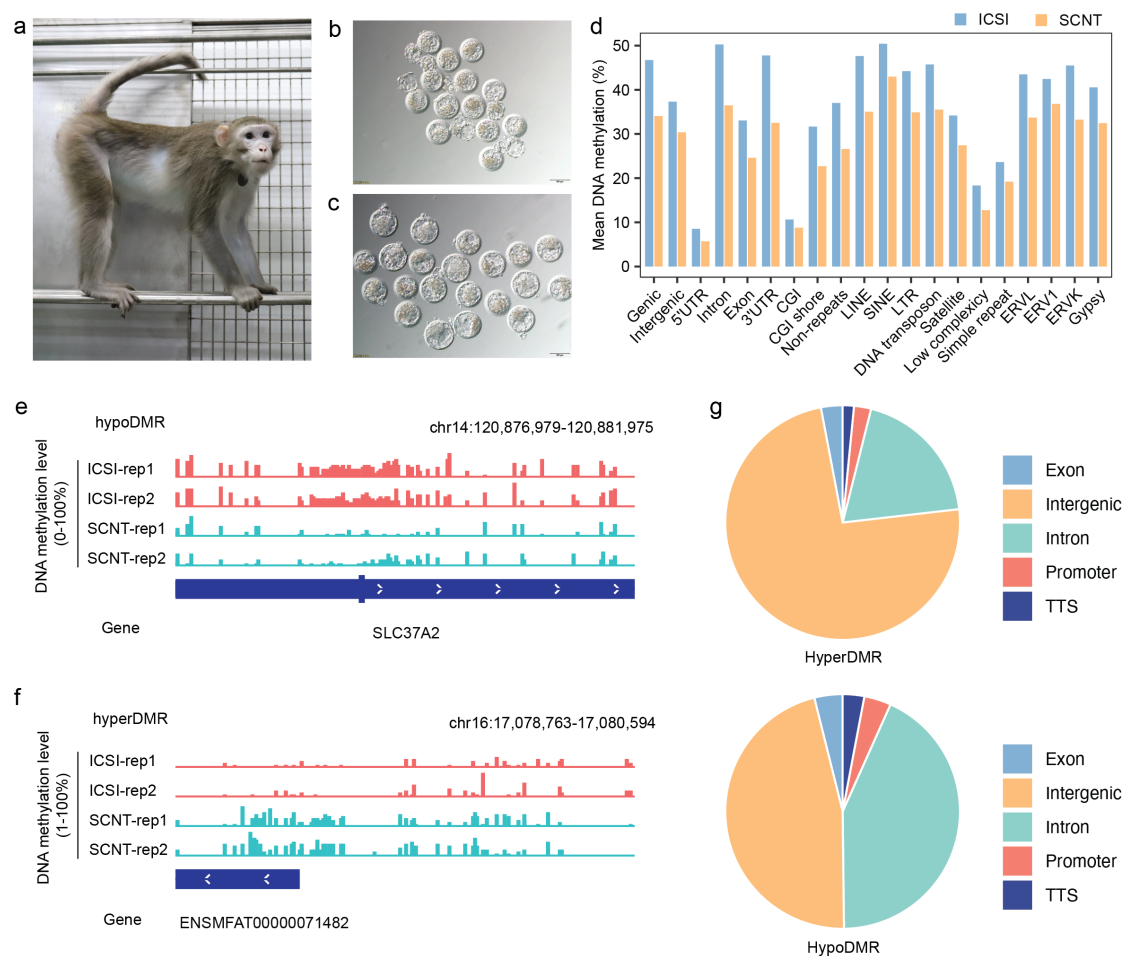

**Supplementary Figure 2. DMRs in hybrid monkey ICSI and SCNT embryos.**

**a** Hybrid monkey utilized to derive fibroblasts for generating hybrid SCNT blastocysts.

**b** Hybrid SCNT blastocysts produced using the hybrid fibroblasts.

**c** Hybrid ICSI blastocysts generated through the usage of sperm from rhesus monkey and oocytes from cynomolgus monkeys.

**d** Bar plot comparing the overall DNA methylation levels of ICSI and SCNT blastocysts across various genomic elements.

**e** Genome browser view displaying representative hypoDMRs.

**f** Genome browser view displaying representative hyperDMRs.

**g** Pie chart depicting the distribution of hyperDMRs and hypoDMRs in genome. TTS, transcription termination site (default defined from -100 bp to +1 kb).

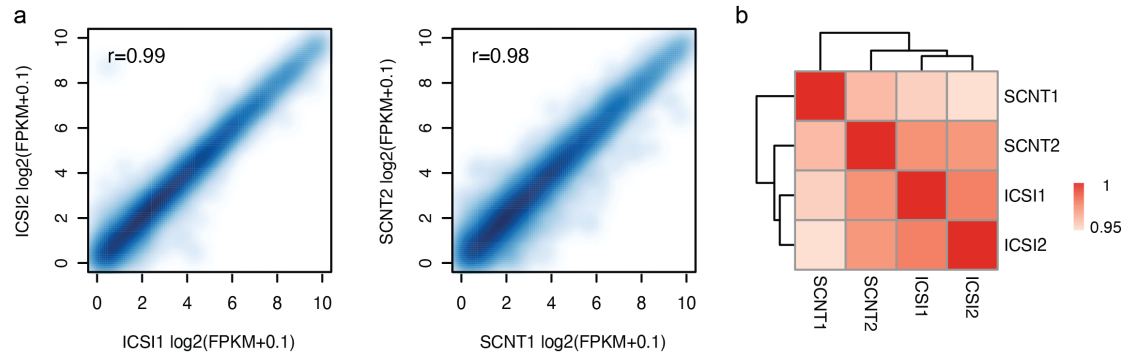

**Supplementary Figure 3. Evaluation of the RNA-seq dataset of ICSI and SCNT blastocysts.**

**a** Scatter plots comparing transcriptomes of biological replicates of ICSI (left) and SCNT (right) blastocysts.  $r$  value in the figure indicates the Pearson correlation coefficient between two replicates within each group.

**b** Heatmap displaying the correlations between the transcriptomes of ICSI and SCNT blastocysts.

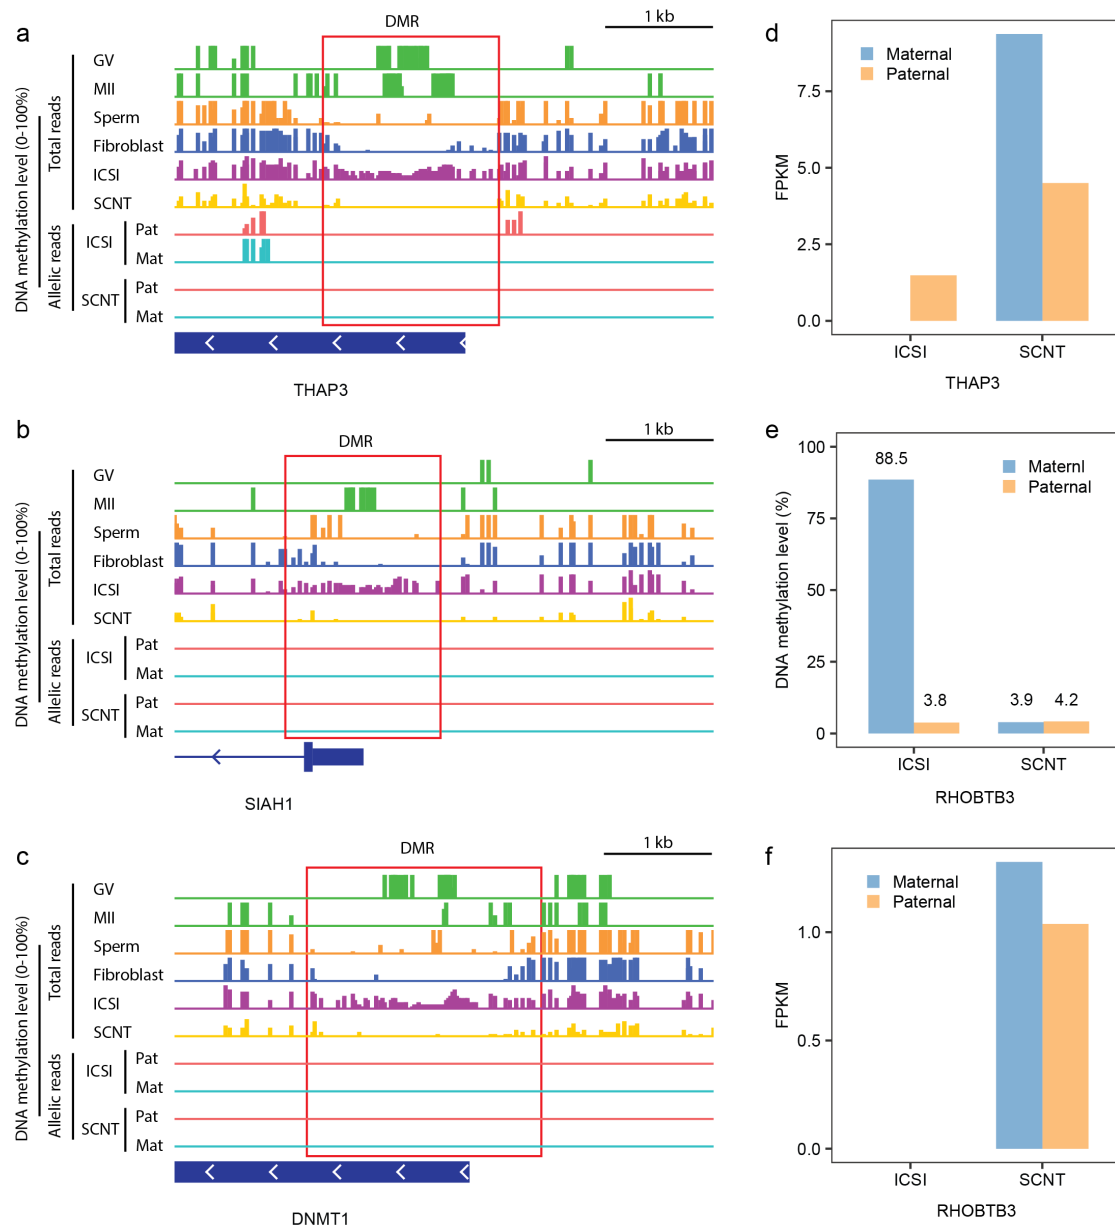

Supplementary Figure 4. **The DNA methylation levels and gene expression levels of the identified imprinted genes.**

**a-c** Genome browser view showing DNA methylation levels flanking the *THAP3*, *SIAH1* and *DNMT1*. The red box represents the identified DMRs. Mat represents the maternal allele, and Pat represents the paternal allele. Scale bars, 1 kb.

**d** Bar plot showing the gene expression level (FPKM) of *THAP3* in the parental genomes of ICSI and SCNT blastocysts.

**e** Bar plot showing the DNA methylation level of *RHOBTB3* in the parental genomes of ICSI and SCNT blastocysts.

**f** Bar plot showing the gene expression level (FPKM) of *RHOBTB3* in the parental genomes of ICSI and SCNT blastocysts.



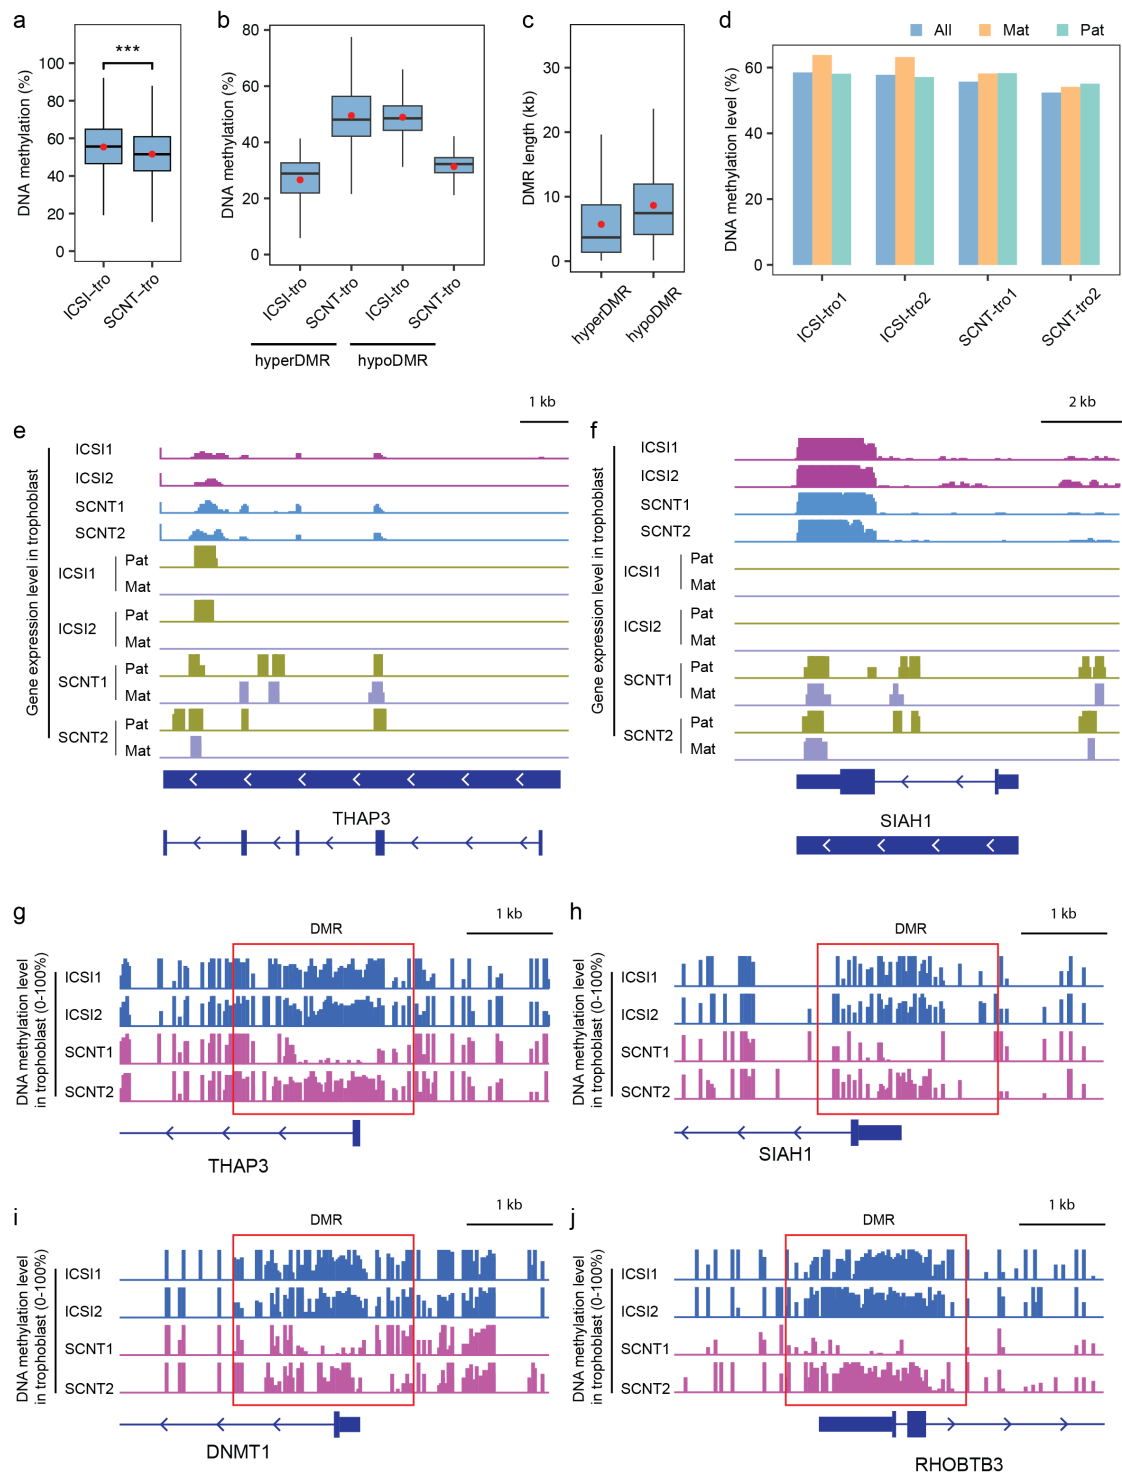

43

44 **Supplementary Figure 5. Identification of ectopically expressed imprinting genes in**  
 45 **the trophoblast cells of SCNT blastocysts.**

**a** Boxplot comparing the DNA methylation levels between ICSI and SCNT trophoblast. The average DNA methylation levels were measured in 10 kb windows. The upper and lower edges of the box indicated the 75% and 25% quantiles, while the thick lines in the middle represents the medians of each sample. The red dots indicate the means for each sample. Statistical analysis was performed using the Wilcoxon rank-sum test.  $p$ -value  $< 0.001$  (\*\*\*). ICSI-tro, trophoblast cells of monkey ICSI embryos. SCNT-tro, trophoblast cells of monkey SCNT embryos.

**b** Boxplot showing the DNA methylation levels of hyperDMRs (2,478) and hypoDMRs (6,816) of ICSI and SCNT trophoblasts. The upper and lower edges of the box indicated the 75% and 25% quantiles, while the thick lines in boxes shows the medians. The red dots signify the means for each sample. ICSI-tro, trophoblast cells of monkey ICSI embryos. SCNT-tro, trophoblast cells of monkey SCNT embryos.

**c** Boxplots comparing the lengths of hyperDMRs and hypoDMRs of ICSI and SCNT trophoblasts. The upper and lower edges of the box indicated the 75% and 25% quantiles, while the thick lines in the middle means the medians of hyper- and hypoDMRs. The red dots stand for the means for each type of sample. ICSI-tro, trophoblast cells of monkey ICSI embryos. SCNT-tro, trophoblast cells of monkey SCNT embryos.

**d** Bar plot comparing the DNA methylation levels of the whole genome (All), paternal (Pat) and maternal (Mat) genomes of the ICSI and SCNT trophoblast cells.

**e** Genome browser view illustrating the parental genome expression levels of *THAP3*. Mat, maternal allele. Pat, paternal allele. Scale bar, 1 kb.

**f** Genome browser view illustrating the parental genome expression levels of *SIAH1*. Mat, maternal allele. Pat, paternal allele. Scale bar, 2 kb.

**g-j** Genome browser view illustrating the DNA methylation level of the DMRs of *THAP3*, *SIAH1*, *DNMT1* and *RHOBTB3* in the parental genomes of ICSI and SCNT trophoblasts. Scale bars, 1kb.

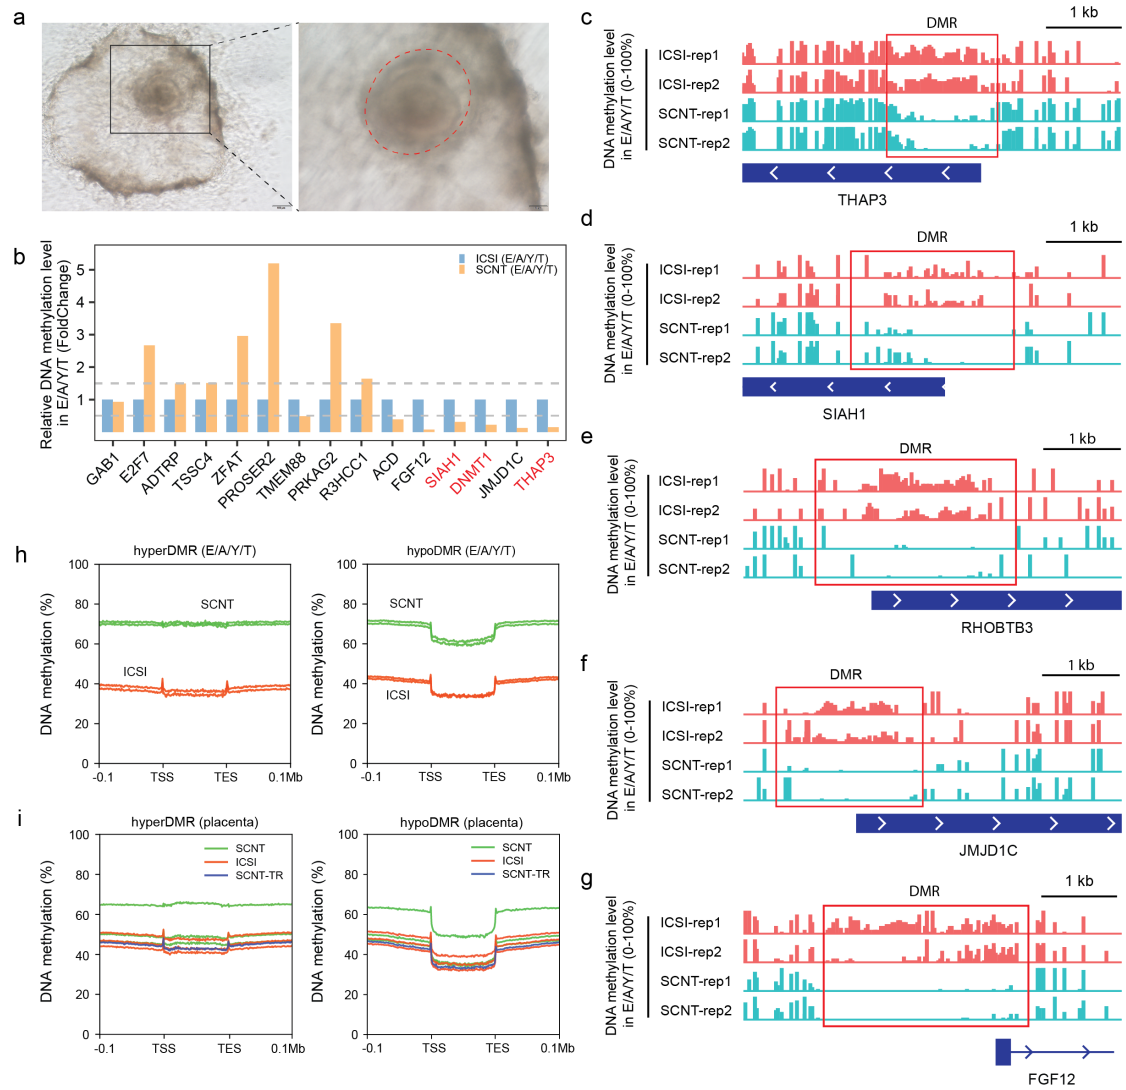

74

75 Supplementary Figure 6. Continuously imprinting loss in post-implanted monkey

76 SCNT embryos.

**a** Representative images of *in vitro* cultured post-implanted monkey ICSI embryos on Day 17 post fertilization. The scale bar is 100  $\mu$ m for left panel and 50  $\mu$ m for the right panel. The right panel provides a closer observation of the boxed region in the left panel with higher resolution. The E/A/Y/T tissues were outlined with red dotted line in the right panel.

**b** Bar plot showing the DNA methylation of the DMRs of the imprinting genes (Figure 4c) in E/A/Y/T.

**c-g** Genome browser view demonstrating the loss of DNA methylation in *THAP3*, *SLAH1*, *RHOBTB3*, *JMJD1C* and *FGF12*. Scale bars, 1 kb.

**h** Average DNA methylation levels of ICSI and SCNT E/A/Y/T tissues in DMRs compared to their flanking ranges. TSS refers to transcription start sites, and TES refers to transcription end sites.

**i** Average DNA methylation levels of ICSI, SCNT and SCNT-TR placentas in DMRs compared with their flanking ranges. SCNT-TR in the panel indicates the placenta used for trophoblast replacement. TSS, transcription start sites. TES, transcription end sites.

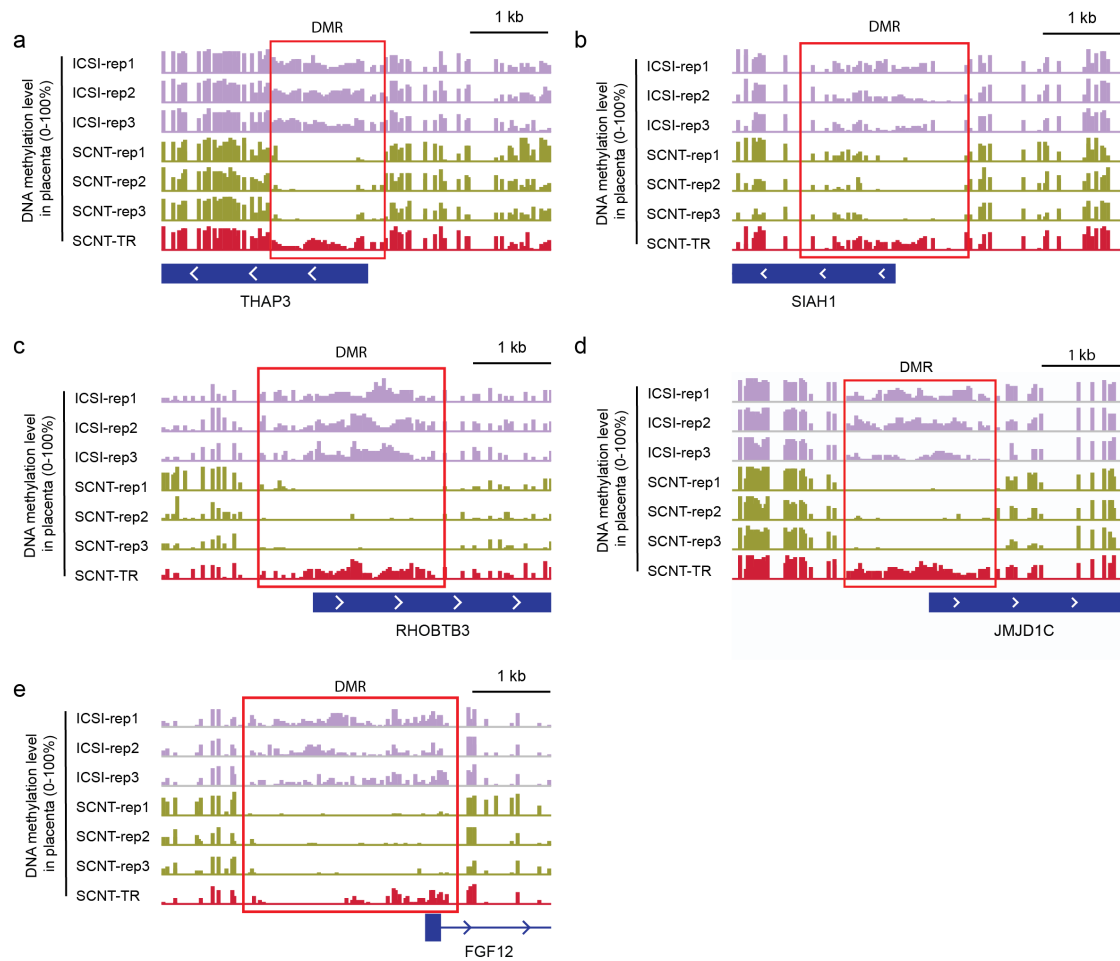

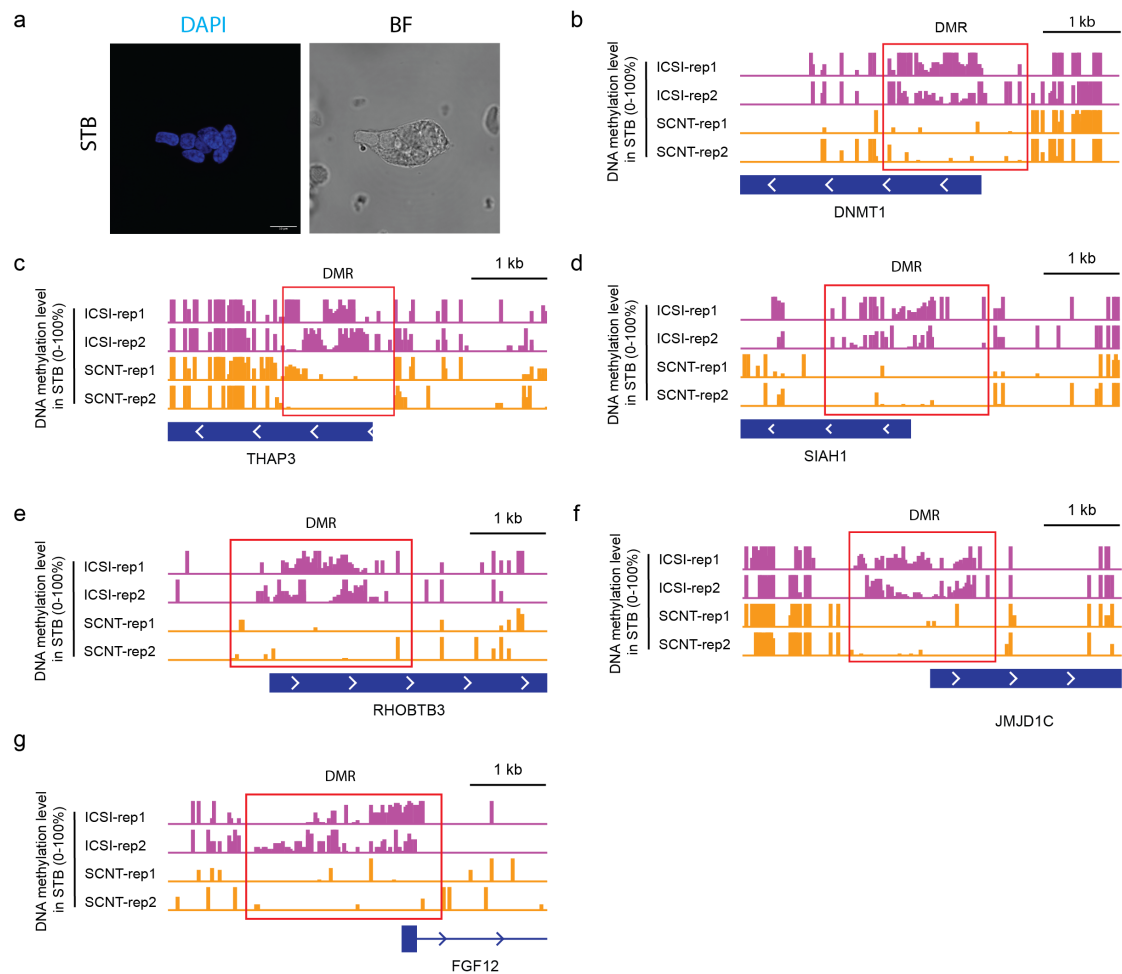

Supplementary Figure 8. **The loss of DNA methylation of candidate imprinting genes in STB cells.**

**a** DAPI staining showing the nuclei within a single STB cell. BF, bright field. Scale bar, 10  $\mu$ m.

**b-g** Genome browser view showing the loss of DNA methylation of *DNMT1*, *THAP3*, *SIAH1*, *RHOBTB3*, *JMJD1C* and *FGF12* in STB cells. Scale bars, 1 kb.

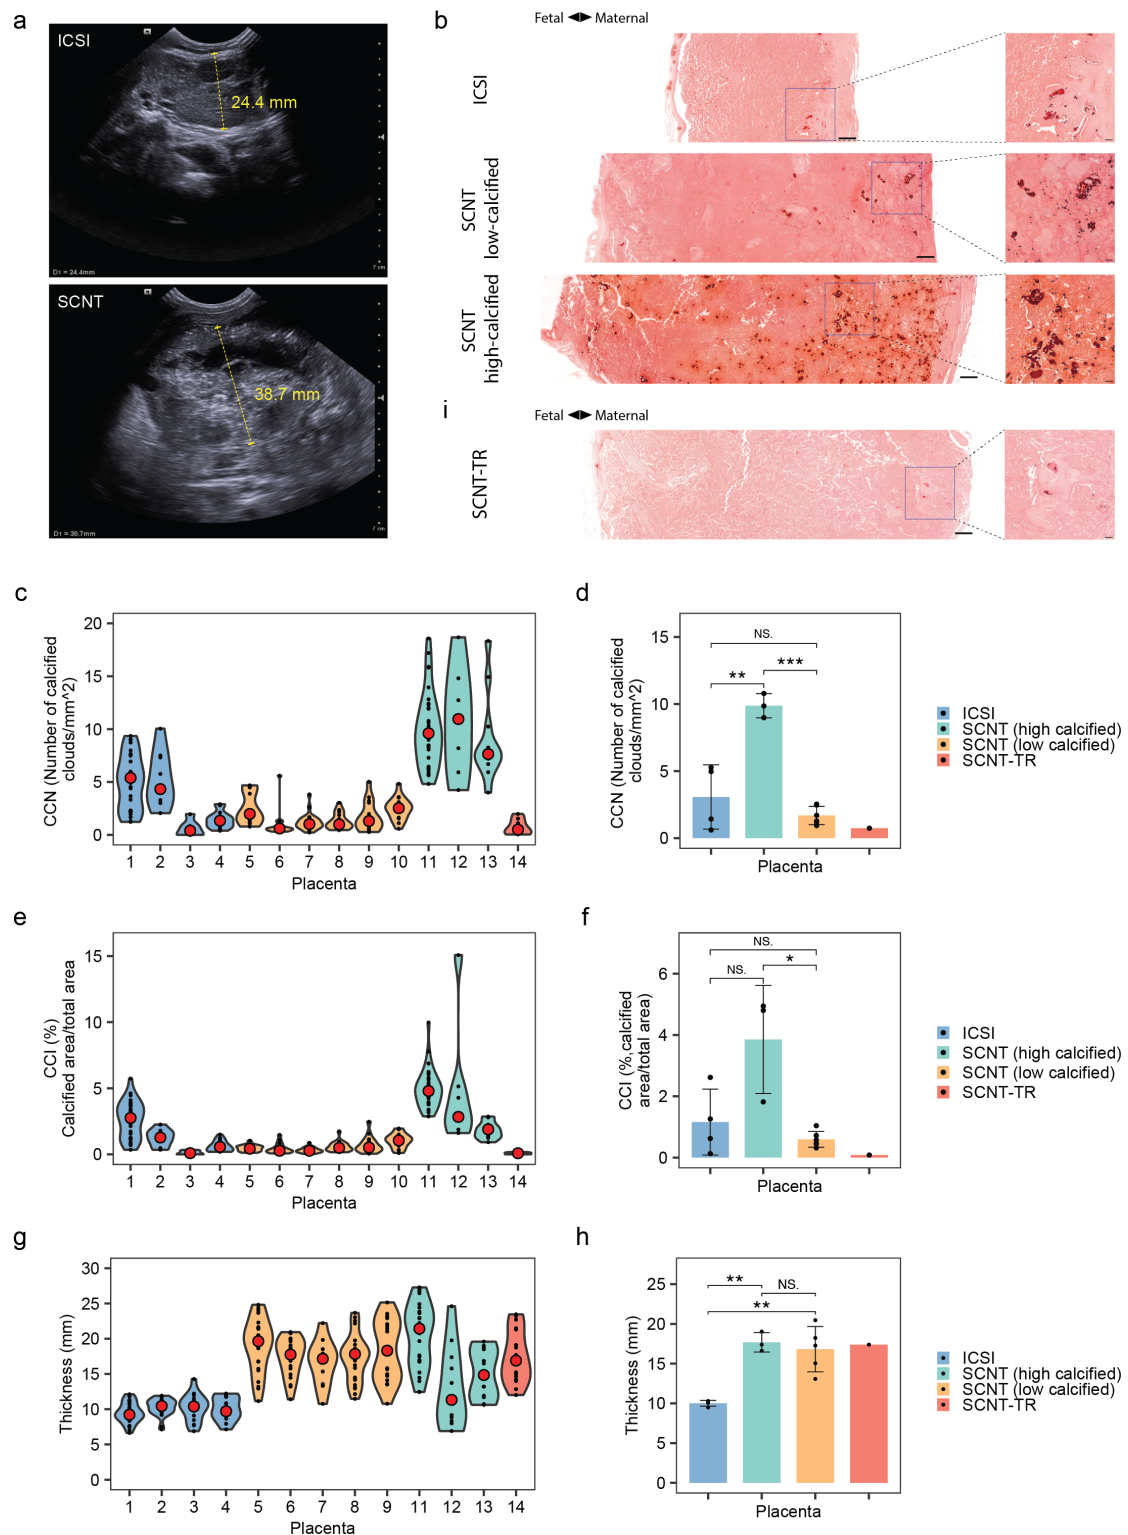

Supplementary Figure 9. **Morphological examination of the monkey placentas.**

**a** Ultrasound images of cynomolgus monkey placentas following ICSI and SCNT techniques on gestation day 145 (up) and 130 (down), respectively. Yellow dotted lines indicate the thickness of the placentas.

**b** Transverse serial sections of ICSI and SCNT placentas (*Macaca fascicularis*) stained with Alizarin red. The high-resolution images on the right are from the blue boxes (3.1 mm x 3.1 mm) in the overview images on the left. The calcified areas are stained deep red as indicated in the slides. The scale bars for overview images are 1 mm, while the scale bars for high-magnification images are 200  $\mu$ m. The fetal-maternal direction is indicated. The image background was adjusted using ImageJ with the Light Background command.

**c** Violin plot showing the number of calcification clouds (CCN) in each placenta. The placentas are labeled as numbers 1-14 on the  $x$ -axis. Each black dot in the bar indicates a single slide. The red dot in each bar represents the mean CCN of each placenta.

**d** Bar plot showing the average CCN for ICSI (n=4), lowly calcified SCNT (n=6), highly calcified SCNT (n=3), and SCNT-TR (n=1) placentas. Results are shown as mean  $\pm$  SD. Each dot in the graph represents a single placenta. Statistical analysis was done using the Student's  $t$ -test. The  $p$ -values for the non-significant differences (NS.) were  $> 0.5$ . Double stars (\*\*) represents the  $p$ -value  $< 0.01$ . Triple stars (\*\*\*) represents the  $p$ -value  $< 0.001$ .

**e** Violin plot showing the calcification index (CCI) of each placenta. The placentas are labeled as numbers 1-14 on the  $x$ -axis. Each black dot in the bar indicates a single slide. The red dots in each bar represents the mean CCN of each placenta.

**f** Bar plot representing the average CCI for ICSI-full term (n=4), SCNT-full term (n=6), SCNT-abortion (n=3), and SCNT-TR (n=1) placentas. Results are displayed as mean  $\pm$  SD. Each dot in the graph represents a single placenta. The statistical analyses were done using the Wilcoxon rank-sum test. The  $p$ -values for the non-significant differences (NS.) were  $> 0.5$ . A single star (\*) represents the  $p$ -value  $< 0.05$ .

**g** Violin plot illustrating the thickness of each placenta. The placentas are numbered 1-14 on the  $x$ -axis. Each black dot within the bar indicates a single slide. The red dots in each bar represents the mean CCN of each placenta.

**h** Bar plot showing the average thickness of ICSI-full term (n=4), SCNT-full term (n=5), SCNT-abortion (n=3), and SCNT-TR (n=1) placentas determined using transverse serial section slides. Results are shown as mean  $\pm$  SD. Each dot in the graph represents a single placenta. The statistical analyses were done using the Student's  $t$ -test. The  $p$ -values for the non-significant differences (NS.) were  $> 0.5$ . Double stars (\*\*) represents the  $p$ -value  $< 0.01$ .



i Transverse serial section of the cloned SCNT-TR placenta of a rhesus monkey. The high-resolution image (right) is from the blue box (3.1 mm x 3.1 mm) in the overview image (left). The calcified areas are highlighted as deep red, as shown in the slides. Scale bar for overview image, 1 mm. Scale bar for high-magnification image, 200  $\mu$ m. The fetal-maternal direction was indicated as the denotation. The image background was adjusted using ImageJ with the Light Background command.

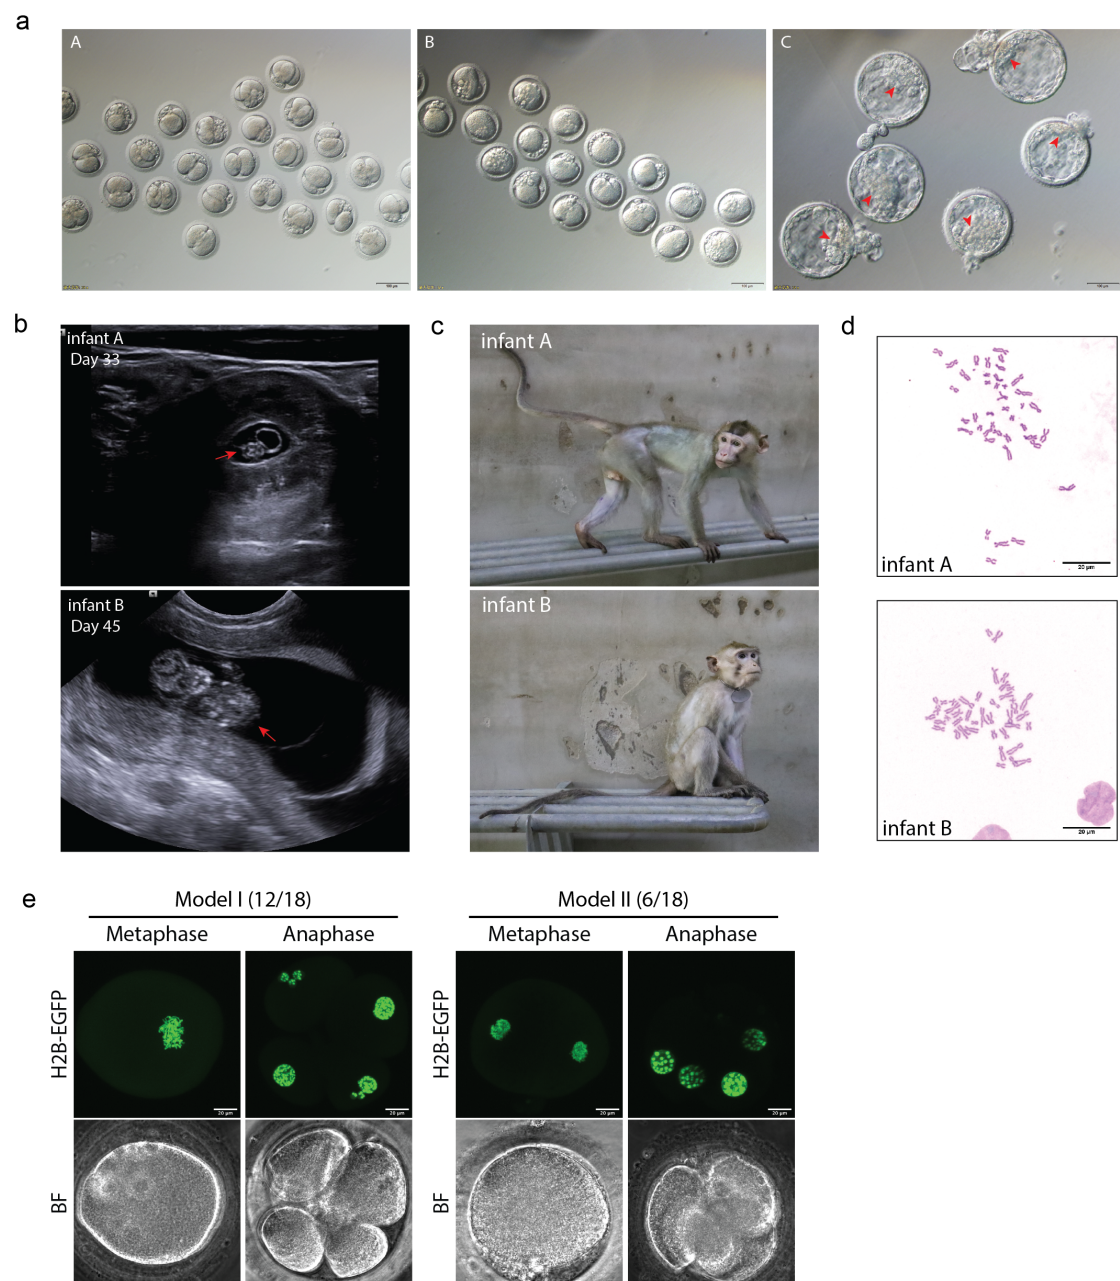

Supplementary Figure 10. **Pre- and post-implant development potential of 2-cell stage electrofused monkey ICSI embryos.**

**a** A, ICSI embryos at the 2-cell stage; B, Electrofused 2-cell stage ICSI embryos, each embryo containing a single fused blastomere; C, 2-cell-stage-electrofused ICSI embryos at the blastocyst stage. Scale bars, 100 μm.

**b** Ultrasound examination of the post-implant development of 2-cell-stage-electrofused embryos on day 33 (infant A) and 45 (infant B) of the gestation periods.

**c** Images of infant A and infant B.

**d** Karyotype analysis of infant A and infant B. Scale bar, 20 μm.

164    **e** Live imaging of the first mitosis of the 2-cell stage fused monkey embryos. Model I,  
165    n=12; Model II, n=6. Scale bar, 20  $\mu$ m.  
166

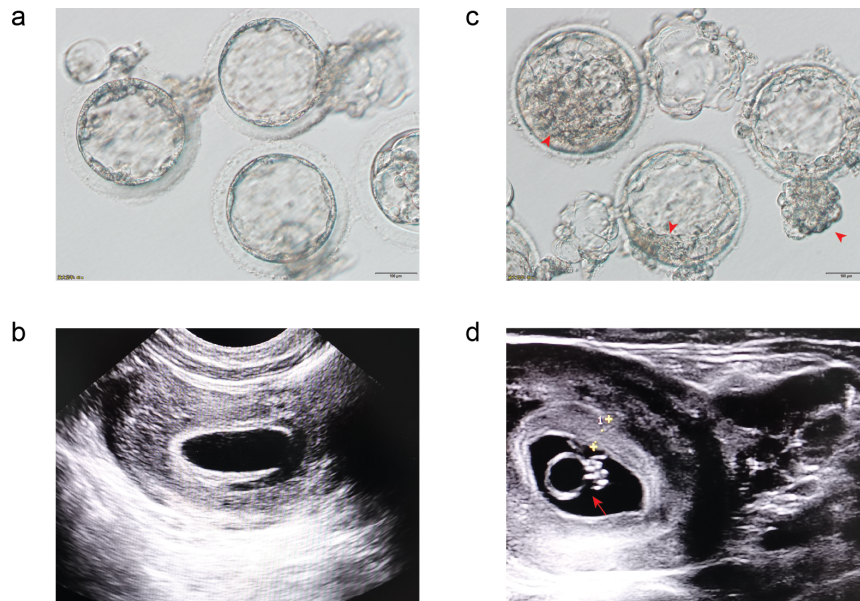

Supplementary Figure 11. **Post-implant development of the ICM-removed ICSI blastocoeles.**

**a** ICSI blastocoeles without ICMs. Scale bar, 100 µm.

**b** Ultrasonography of a fetus-free gestational sac (day 28) derived from ICM-removed ICSI blastocoeles.

**c** ICSI blastocysts with ICMs (red arrowheads). Scale bar, 100 µm.

**d** Ultrasonography of a gestational sac carrying a fetus (day 28, red arrow).

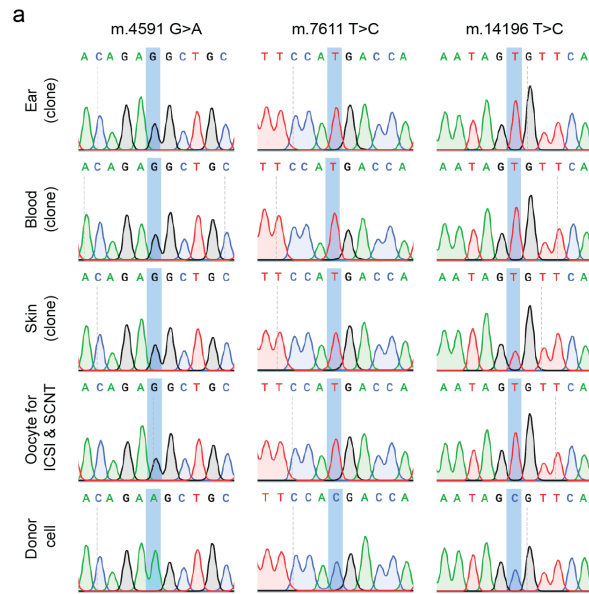

Supplementary Figure 12. **Mitochondrial origin of the cloned rhesus monkey.**  
**a** Representative SNP alleles showing the mtDNA origin of the cloned rhesus monkey.

**Supplementary Table 1. Summarize of the samples used for WGBS and RNA-seq.**

| Sample Type | Datasets | Sample Name                 | Maternal (♀) <sup>1</sup> | Paternal (♂) <sup>2</sup> | Hybrid type<br>(♀ × ♂)            | Number of embryos for<br>each replication |
|-------------|----------|-----------------------------|---------------------------|---------------------------|-----------------------------------|-------------------------------------------|
| Blastocyst  | WGBS     | ICSI-blastocyst-WGBS-rep1   | 634#                      | 1007207#                  | cy <sup>3</sup> × rh <sup>4</sup> | 11                                        |
|             |          | ICSI-blastocyst-WGBS-rep2   | 634#                      | 1007207#                  | cy × rh                           | 10                                        |
|             |          | SCNT-blastocyst-WGBS-rep1   | 18#                       | 1007207#                  | cy × rh                           | 11                                        |
|             |          | SCNT-blastocyst-WGBS-rep2   | 18#                       | 1007207#                  | cy × rh                           | 12                                        |
|             | RNA-seq  | ICSI-blastocyst-RNAseq-rep1 | 597#                      | 1007207#                  | cy × rh                           | 2                                         |
|             |          | ICSI-blastocyst-RNAseq-rep2 | 683#                      | 1007207#                  | cy × rh                           | 3                                         |
|             |          | SCNT-blastocyst-RNAseq-rep1 | 18#                       | 1007207#                  | cy × rh                           | 3                                         |
|             |          | SCNT-blastocyst-RNAseq-rep2 | 18#                       | 1007207#                  | cy × rh                           | 1                                         |
| Trophoblast | WGBS     | ICSI-Tro-WGBS-rep1          | 1010#                     | 1005163#                  | cy <sup>3</sup> × rh <sup>4</sup> | 6~8                                       |
|             |          | ICSI-Tro-WGBS-rep2          | 1010#                     | 1005163#                  | cy × rh                           | 6~8                                       |
|             |          | SCNT-Tro-WGBS-rep1          | 5115#                     | 10#                       | rh × cy                           | 6~8                                       |
|             |          | SCNT-Tro-WGBS-rep2          | 5115#                     | 10#                       | rh × cy                           | 6~8                                       |
|             | RNA-seq  | ICSI-Tro-RNAseq-rep1        | 1010#                     | 1005163#                  | cy × rh                           | 2~4                                       |
|             |          | ICSI-Tro-RNAseq-rep2        | 1010#                     | 1005163#                  | cy × rh                           | 2~4                                       |
|             |          | SCNT-Tro-RNAseq-rep1        | 5115#                     | 10#                       | rh × cy                           | 2~4                                       |
|             |          | SCNT-Tro-RNAseq-rep2        | 5115#                     | 10#                       | rh × cy                           | 2~4                                       |

<sup>1</sup>The number in this column indicates the name of the oocyte donor monkey;

<sup>2</sup>The number in this column indicates the name of the sperm donor monkey;

<sup>3</sup>"cy" is the short for cynomolgus monkey (*Macaca fascicularis*);

<sup>4</sup>"rh" is the short for rhesus monkey (*Macaca mulatta*).

**Supplementary Table 2. The identified aberrant imprinted genes with their corresponding DMRs in monkey SCNT blastocysts.**

| GeneName | Chr   | Start     | End       |
|----------|-------|-----------|-----------|
| ACD      | chr20 | 55834531  | 55836301  |
| DNMT1    | chr19 | 10452797  | 10454829  |
| FGF12    | chr2  | 5133102   | 5135911   |
| JMJD1C   | chr9  | 72565569  | 72567065  |
| JMJD1C   | chr9  | 72564615  | 72565234  |
| PRKAG2   | chr3  | 184472967 | 184479841 |
| PRKAG2   | chr3  | 184548966 | 184552073 |
| PRKAG2   | chr3  | 184469622 | 184471698 |
| PRKAG2   | chr3  | 184498437 | 184499542 |
| PROSER2  | chr9  | 12303906  | 12306066  |
| PROSER2  | chr9  | 12258138  | 12261817  |
| PROSER2  | chr9  | 12326560  | 12330373  |
| R3HCC1   | chr8  | 23651318  | 23653476  |
| SIAH1    | chr20 | 36038172  | 36040179  |
| THAP3    | chr1  | 221723668 | 221725102 |
| TMEM88   | chr16 | 7961392   | 7962280   |
| TMEM88   | chr16 | 7957989   | 7958814   |
| TSSC4    | chr14 | 2365111   | 2367213   |
| ZFAT     | chr8  | 136086665 | 136090087 |
| ADTRP    | chr4  | 159031354 | 159047087 |
| ADTRP    | chr4  | 158947201 | 158956999 |
| ADTRP    | chr4  | 159016574 | 159021884 |
| E2F7     | chr11 | 76469652  | 76476469  |
| GAB1     | chr5  | 142676985 | 142679038 |

**Supplementary Table 3. Summary of the placenta used for morphological examination in this research.**

| Sample type           | Sample Name | CCI (calcification index, %) | Average CCI (%) | CCN (No. of calcified clouds/mm <sup>2</sup> ) | Average CCN | Thickness (mm) | Average thickness (mm) |
|-----------------------|-------------|------------------------------|-----------------|------------------------------------------------|-------------|----------------|------------------------|
| ICSI                  | 1           | 2.62                         | 1.16            | 4.97                                           | 3.06        | 9.48           | 10.01                  |
|                       | 2           | 1.26                         |                 | 5.26                                           |             | 10.30          |                        |
|                       | 3           | 0.13                         |                 | 0.60                                           |             | 10.21          |                        |
|                       | 4           | 0.62                         |                 | 1.42                                           |             | 10.06          |                        |
| SCNT (low calcified)  | 5           | 0.47                         | 0.59            | 2.53                                           | 1.68        | 19.03          | 17.71                  |
|                       | 6           | 0.45                         |                 | 0.93                                           |             | 17.39          |                        |
|                       | 7           | 0.32                         |                 | 1.20                                           |             | 16.62          |                        |
|                       | 8           | 0.58                         |                 | 1.27                                           |             | 17.27          |                        |
|                       | 9           | 0.72                         |                 | 1.70                                           |             | 18.24          |                        |
|                       | 10          | 1.04                         |                 | 2.47                                           |             | /*             |                        |
| SCNT (high calcified) | 11          | 4.94                         | 3.85            | 9.85                                           | 9.87        | 20.47          | 16.20                  |
|                       | 12          | 4.80                         |                 | 10.79                                          |             | 13.08          |                        |
|                       | 13          | 1.82                         |                 | 8.98                                           |             | 15.04          |                        |
| SCNT-TR               | 14          | 0.08                         | 0.08            | 0.74                                           | 0.74        | 17.39          | 17.39                  |

\* The data was not available due to the improper sample preparation.



**Supplementary Table 4. Post-implant development of hypothetical monkey tetraploid embryos.**

| Electrofused<br>embryos<br>transferred | Surrogates | Pregnant | Implantation<br>(%)* | Fetus<br>(%)* | Live birth<br>(%)* | Survival<br>(%)* |
|----------------------------------------|------------|----------|----------------------|---------------|--------------------|------------------|
| 49                                     | 16         | 8        | 16 (32.7)            | 8 (16.3)      | 3 (6.1)            | 2 (4.1)          |

\* Data were calculated based on embryos transferred.

**Supplementary Table 5. Post-implant development of ICM-removed monkey ICSI blastocoeles.**

| Blastocoele cavities transferred | Surrogate | Pregnant | Implantation (%) <sup>*</sup> | Fetus (%) <sup>*</sup> |
|----------------------------------|-----------|----------|-------------------------------|------------------------|
| 83                               | 33        | 10       | 10 (12.0)                     | 0 (0.0)                |

<sup>\*</sup> Data were calculated based on the number of blastocoele cavities transferred.

**Supplementary Table 6. Trials of the reconstruction of rhesus SCNT-TR embryos in this study.**

| Trials | Total embryos<br>activated | Blastocyst<br>used | Blastocyst rate<br>(%) | Reconstructed<br>embryos (ICMs) |
|--------|----------------------------|--------------------|------------------------|---------------------------------|
| 1      | 46                         | 8                  | 17.4                   | 4 (4)                           |
| 2      | 16                         | 9                  | 56.3                   | 2 (2)*                          |
| 3      | 21                         | 10                 | 47.6                   | 3 (6)                           |
| 4      | 17                         | 2                  | 11.8                   | 1 (2)                           |
| 5      | 13                         | 3                  | 23.1                   | 1 (3)                           |
| Total  | 113                        | 32                 | 28.3                   | 11 (17)                         |

\* The cloned rhesus monkey was generated by the 2nd trial.

**Supplementary Table 7. Short tandem repeat analysis of the cloned rhesus monkey derived by trophoblast replacement.**

|                 | Donor cell | Rhesus clone | Surrogate | Oocyte for ICSI & SCNT | Sperm donor | Cloned placenta     |
|-----------------|------------|--------------|-----------|------------------------|-------------|---------------------|
| <b>D1S548</b>   | 192/200    | 192/200      | 195/200   | 195/195                | 200/200     | 192/195/200         |
| <b>D2S149</b>   | 204/210    | 204/210      | 204/204   | 204/204                | 200/210     | 204/210             |
| <b>D2S1333</b>  | 278/289    | 278/289      | 274/297   | 274/278                | 289/289     | 274/278/289         |
| <b>D3S1768</b>  | 184/188    | 184/188      | 184/192   | 184/188                | 184/188     | 184/188             |
| <b>D4S413</b>   | 126/140    | 126/140      | 128/130   | 136/138                | 128/140     | 126/138/140         |
| <b>D4S2365</b>  | 277/281    | 277/281      | 281/281   | 277/281                | 277/285     | 277/281/285         |
| <b>D5S1457</b>  | 124/128    | 124/128      | 120/128   | 124/128                | 124/124     | 124/128             |
| <b>D6S276</b>   | 116/124    | 116/124      | 114/128   | 114/126                | 116/126     | 114/116/124/126     |
| <b>D6S291</b>   | 202/214    | 202/214      | 202/212   | 198/204                | 198/214     | 198/202/214         |
| <b>D6S501</b>   | 175/183    | 175/183      | 167/187   | 175/175                | 183/187     | 175/183             |
| <b>D6S2741</b>  | 268/269    | 268/269      | 256/273   | 253/271                | 268/277     | 268/269/271/277     |
| <b>D6S2883</b>  | 245/271    | 245/271      | 253/268   | 253/256                | 236/245     | 236/245/256/271     |
| <b>D7S513</b>   | 184/194    | 184/194      | 177/192   | 184/198                | 184/184     | 184/194/198         |
| <b>D7S794</b>   | 118/135    | 118/135      | 106/126   | 126/135                | 118/126     | 118/126/135         |
| <b>D8S1106</b>  | 131/135    | 131/135      | 135/135   | 131/148                | 131/139     | 131/135/139         |
| <b>D9S921</b>   | 158/166    | 158/166      | 182/190   | 166/178                | 158/174     | 158/166             |
| <b>D10S1412</b> | 154/157    | 154/157      | 148/154   | 160/166                | 154/160     | 154/157/166         |
| <b>D11S925</b>  | 254/279    | 254/279      | 277/279   | 263/263                | 254/277     | 254/263/277/279     |
| <b>D11S2002</b> | 261/261    | 261/261      | 253/261   | 257/261                | 261/265     | 257/261             |
| <b>D12S364</b>  | 100/107    | 100/107      | 107/120   | 112/114                | 100/124     | 100/107/114/124     |
| <b>D13S765</b>  | 207/215    | 207/215      | 175/227   | 152/207                | 207/207     | 152/207/215         |
| <b>D15S823</b>  | 333/350    | 333/350      | 316/316   | 307/361                | 333/380     | 316/333/350/361/380 |
| <b>D16S409</b>  | 131/131    | 131/131      | 131/131   | 131/131                | 131/137     | 131/131             |
| <b>D17S1300</b> | 234/288    | 234/288      | 226/280   | 251/257                | 234/273     | 234/251/273/288     |
| <b>D18S537</b>  | 158/170    | 158/170      | 162/170   | 162/170                | 170/170     | 158/162/170         |
| <b>D22S685</b>  | 309/329    | 309/329      | 282/329   | 309/341                | 309/357     | 309/329/341/357     |
| <b>DXS2506</b>  | 276/276    | 276/276      | 276/276   | 265/284                | 265/265     | 265/276             |
| <b>MFGT21</b>   | 105/116    | 105/116      | 105/121   | 112/114                | 107/116     | 105/107/114/116     |
| <b>MFGT22</b>   | 109/122    | 109/122      | 130/132   | 107/124                | 109/122     | 107/109             |

207 **Supplementary Table 8. Primers used in this study.**

|                                                               |               |                                                  |
|---------------------------------------------------------------|---------------|--------------------------------------------------|
| Primers for <i>Kdm4d</i> <i>in vitro</i> transcription        | Forward       | TTAATACGACTCACTATAGGGATGGAACTATGAAGTCTAAGGCCAACT |
|                                                               | Reverse       | ATATAAGACAGCCCGTGGACTTAGG                        |
| Primers for H2B-EGFP <i>in vitro</i> transcription            | Forward       | AGCAATGCTCGTTTAGGGAACC                           |
|                                                               | Reverse       | GCGCGCAATTAACCCCTCACT                            |
| Primers for mtDNA SNPs identification                         | 278F          | CATGCAGTTGTTGATCGCACCTA                          |
|                                                               | 278R          | GGTTTGGCAAGAGTGGGTT                              |
|                                                               | 4061F         | ACAACCACAATCTTCTAGGCACA                          |
|                                                               | 4061R         | GGGGAATGCTGGAGATTGCG                             |
|                                                               | 4591F         | CCTGAGAATCCAACTTCTCCGTG                          |
|                                                               | 4591R         | AGCATCCTGATAGTAGGTTGTTGG                         |
|                                                               | 5803F         | CTGCAAACACCTACTCTGCATCAA                         |
|                                                               | 5803R         | GGCTCAGGGCAGTGCCTATGA                            |
|                                                               | 6040F         | TCATAGGCACTGCCCTGAGCC                            |
|                                                               | 6040R         | GCGGCTAGGACTGGTAGAGAGAG                          |
|                                                               | 6988F         | ATAATCATTGCAATCCCCACCGGT                         |
|                                                               | 6988R         | GATGGTGAAGGATGGGTCTGTTG                          |
|                                                               | 8680F         | ACCCCTTTCTCAACCCCAACAATC                         |
|                                                               | 8680R         | TGGTAGGAGGTGGGCTAGGGAG                           |
|                                                               | 9543F         | CATAGTTAAACCCAGTCCCTGGCC                         |
|                                                               | 9543R         | TCGGAGATGGTGAAGGGTGCTTC                          |
|                                                               | 10051F        | ACCACAGGCTTCCACGGAC                              |
|                                                               | 10051R        | GGGAGGTTTGTGTTTGAATGGCT                          |
|                                                               | 11530F        | GAGACCACTCTCATTCTACCT                            |
|                                                               | 11530R        | TGTTTCTCGTGTGAAGGGGGG                            |
|                                                               | 13628F        | CCCTTCCTCACAGGCTTCTACTCC                         |
|                                                               | 13628R        | GTTAGTGGTGTGGTTGGTTGTGTG                         |
|                                                               | 15129F        | GGACTCCAACCATAACTAACGGCA                         |
|                                                               | 15129R        | GCTGTCAATGGCGTATCCTCCTC                          |
|                                                               | 16038F        | CACTATCGGCCAAGTAGCATCCAT                         |
|                                                               | 16038R        | GCATCCGTGGTGAGGAGGATTAT                          |
| Primers for X chromosome SNPs identification                  | X9-F          | TGGTTTCCTGAGATTACCGCAA                           |
|                                                               | X9-R          | TTATGGTGCCCCATCAGTTAC                            |
|                                                               | X15-F         | GGTCCATCTGTGCTTGAAC                              |
|                                                               | X15-R         | ATTTCAGCGAGGAAAGACAAC                            |
| Deep sequencing primers for X chromosome SNPs of rhesus clone | deepseq-X9-F  | ggagtgtgtacggtgtgtgcGTCACCCTTGCCATTTTGTTC        |
|                                                               | deepseq-X9-R  | gagttggtgtgtgtgtgAGTTTAATGCTGACTCTGCTGG          |
|                                                               | deepseq-X15-F | ggagtgtgtacggtgtgtgcCATGGAATCAATACACCCCAATG      |
|                                                               | deepseq-X15-R | gagttggtgtgtgtgtgATTTCAGCGAGGAAAGACAAC           |

208

209

**Supplementary Table 9. Software and packages used in this study for RNA-seq, WGBS and WGS data processing.**

|                                 |                                                                                                                                               |
|---------------------------------|-----------------------------------------------------------------------------------------------------------------------------------------------|
| ABI PRISM 3730 genetic analyzer | ABI                                                                                                                                           |
| ImageJ                          | <a href="https://imagej.nih.gov/ij/">https://imagej.nih.gov/ij/</a>                                                                           |
| fastp (version 0.23.2)          | <a href="https://github.com/OpenGene/fastp">https://github.com/OpenGene/fastp</a>                                                             |
| Bismark (version 0.23.1)        | <a href="https://www.bioinformatics.babraham.ac.uk/projects/bismark/">https://www.bioinformatics.babraham.ac.uk/projects/bismark/</a>         |
| Hisat2 (version 2.2.1)          | <a href="https://github.com/DaehwanKimLab/hisat2">https://github.com/DaehwanKimLab/hisat2</a>                                                 |
| SAMtools (version 1.15.1)       | <a href="https://github.com/samtools/samtools">https://github.com/samtools/samtools</a>                                                       |
| featureCounts (version 2.0.1)   | <a href="https://subread.sourceforge.net/featureCounts.html">https://subread.sourceforge.net/featureCounts.html</a>                           |
| Deeptools (version 3.5.1)       | <a href="https://deeptools.readthedocs.io/en/develop/">https://deeptools.readthedocs.io/en/develop/</a>                                       |
| Bowtie2 (version 2.4.5)         | <a href="https://bowtie-bio.sourceforge.net/bowtie2/index.shtml">https://bowtie-bio.sourceforge.net/bowtie2/index.shtml</a>                   |
| SNPspllit (version 0.5.0)       | <a href="https://www.bioinformatics.babraham.ac.uk/projects/SNPspllit/">https://www.bioinformatics.babraham.ac.uk/projects/SNPspllit/</a>     |
| methpipe (version 3.4.3)        | <a href="https://github.com/smithlabcode/methpipe">https://github.com/smithlabcode/methpipe</a>                                               |
| methyKit                        | <a href="https://github.com/al2na/methyKit">https://github.com/al2na/methyKit</a>                                                             |
| HOMER (version 4.11)            | <a href="http://homer.ucsd.edu/homer/">http://homer.ucsd.edu/homer/</a>                                                                       |
| edgeR                           | <a href="https://bioinf.wehi.edu.au/edgeR/">https://bioinf.wehi.edu.au/edgeR/</a>                                                             |
| BWA (version 0.7.17-r1188)      | <a href="https://hpc.nih.gov/apps/bwa.html">https://hpc.nih.gov/apps/bwa.html</a>                                                             |
| GATK (version 4.2.6.1)          | <a href="https://github.com/broadinstitute/gatk">https://github.com/broadinstitute/gatk</a>                                                   |
| sentieon (Release 202112.05)    | <a href="https://www.sentieon.com">https://www.sentieon.com</a>                                                                               |
| BEDtools (version 2.30.0)       | <a href="https://bedtools.readthedocs.io/en/latest/index.html">https://bedtools.readthedocs.io/en/latest/index.html</a>                       |
| R (version 4.2.1)               | <a href="https://www.r-project.org">https://www.r-project.org</a>                                                                             |
| Trim_galore (version 0.6.7)     | <a href="https://www.bioinformatics.babraham.ac.uk/projects/trim_galore/">https://www.bioinformatics.babraham.ac.uk/projects/trim_galore/</a> |
